# Supplementary material for: Identifying Practices to Promote Inpatient Adolescent and Influenza Vaccine Delivery
Source: Oxford University Press journal article supplement (doi:10.1542/hpeds.2021-005924), 2021-11-22
Supplement: hpeds_2021-005924supplementarydata.pdf [file hpeds_2021-005924supplementarydata.pdf]

## Supplemental Materials

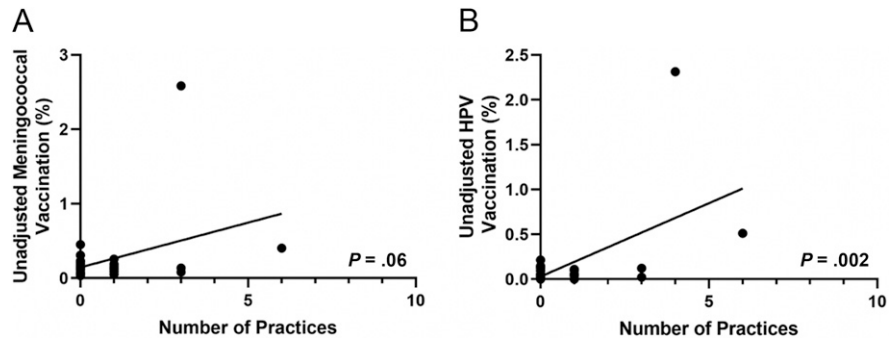

**SUPPLEMENTAL FIGURE 4** Association between unadjusted inpatient vaccine delivery rates and number of hospital vaccine delivery practices for meningococcal (A) and HPV vaccines (B). Associations remained after removal of the outlier site from both vaccine types.
